# Supplementary material for: Selective anion sensing based on a dual-chromophore approach
Source: Royal Society of Chemistry journal article supplement (doi:10.1039/b102187g), 2001-01-01
Supplement: b102187g.doc [file b102187g.doc]

Supporting Information

1. Synthesis

Reagents and condition: (a) NBS, HCO2Me, AIBN, , hv, 3h, 69%; (b) i. NaN3, DMF, RT, 3h, ii.LAH, THF, 0C, iii. Boc2O, THF, aq. Na2CO3, RT, 3h, 70%; (c) i. aq. NaOH, MeOH, RT, ii. *p*-nitroaniline, NaNO2, aq. HCl, MeOH, 0C, 49%; (d) i. TFA, anisole. CH2Cl2, ii. *p*-nitrophenyl isothiocyanate, TEA, THF, RT, 70%; (e) i. TFA, anisole. CH2Cl2, ii. Phenyl isothiocyanate, TEA, THF, RT.70%.

**Sensor 1**

To a solution of the amine salt (105 mg, 0.2 mmol) in 10mL of DMF, prepared by acid promoted N-Boc removal of **5**,1 were added TEA (0.08 ml, 0.6 mmol) and *p*-nitro-phenyl isothiocyanate (71.5 mg, 0.4 mmol). After stirring the reaction mixture for 1 h, it was diluted with CH2Cl2, and washed with water. The organic extracts was dried over Na2SO4, concentrated, and then chromatographed (eluent gradient 15:1 to 10:1 CH2Cl2/MeOH) to give the desired product (85 mg, 65 %).

1H-NMR (300 MHz, CDCl3)  5.04-5.06 (d, 4H, Ar*CH2*NH), 7.88-7.91 (d, 4H, NHAr*H*s), 7.99 (s, 2H, Ar*H*s) 8.01-8.04 (d, 2H, NO2Ar*H*s), 8.19-8.22 (d, 4H, NHAr*H*s) 8.38-8.41 (d, 4H, NO2Ar*H*s).

13C-NMR (300 MHz, acetone-d6)  44.34, 122.14, 123.48, 124.72, 125.18, 126.18, 126.42, 143.68, 146.13, 148.78, 156.30, 158.24, 181.19.

MS (FAB) m/z 662.12 (M+).

**Sensor 2**

To a solution of the amine salt (105 mg, 0.2 mmol) in 10mL of DMF, prepared by acid promoted N-Boc removal of **5**,1 were added TEA (0.08 ml, 0.6 mmol) and phenyl isothiocyanate (54 mg, 0.4 mmol). After stirring the reaction mixture for 1 h, it was diluted with CH2Cl2, and washed with water. The organic extracts was dried over Na2SO4, concentrated, and then chromatographed (eluent gradient 15:1 to 10:1 CH2Cl2/MeOH) to give the desired product (76 mg, 67 %).

1H-NMR (300 MHz, acetone-d6)  4.99-5.01 (d, 4H, Ar*CH2*NH), 7.14-7.19 (t, 1H, NHAr*H*s), 7.33-7.38 (t, 4H, NHAr*H*s), 7.50-7.52 (d, 4H, NHAr*H*s) 8.01 (s, 2H, Ar*H*s) 8.06-8.09 (d, 2H, NO2Ar*H*s), 8.41-8.44 (d, 2H, NO2Ar*H*s).

13C-NMR (300 MHz, acetone-d6)  44.25, 123.50, 124.30, 125.29, 125.87, 127.22, 129.25, 139.45, 148.74, 156.47, 181.50.

MS (FAB) m/z 572.12 (M+).

**2. UV-vis titration**

All stock solutions were prepared in chloroform. The spectra were collected on a Beckman DU-650 UV/Vis spectrophotometer. Anion binding titrations were carried out by monitoring changes in the UV-vis absorption band at **max of free sensors **1** and **2** as a function of added anion concentration. The resulting decrease in the absorbance intensity was fitted as decribed by Conners.2

(a) (b)

**Fig. S 1.** UV-vis titration (a) of **1** with H2PO4-*n*-Bu4N+ in CHCl3. [**1**] = 5 x 10-5 M constant, [H2PO4-] = 0 equiv. -30 equiv. of **1** (b) of **2** with H2PO4-*n*-Bu4N+ in CHCl3. [**2**] = 1.5 x 10-5 M constant, [H2PO4-] = 0 equiv. -30 equiv. of **2**

Binding Constants (M-1):

**sensor 1 = 22000, **sensor 2 = 24000

|  | AcO- | F- | H2PO4- | Cl- | Br- | HSO4- | I- |
| --- | --- | --- | --- | --- | --- | --- | --- |
| Sensor 1 | > 106 | > 106 | > 106 | > 106 | > 106 | > 106 | > 106 |
| Sensor 2 | > 106 | > 106 | > 106 | 7.0 x 104 | 3.4 x 102 | NDa | NDa |

a No detectable binding. (all error range : ±17%)

**3. Color changes of 1**


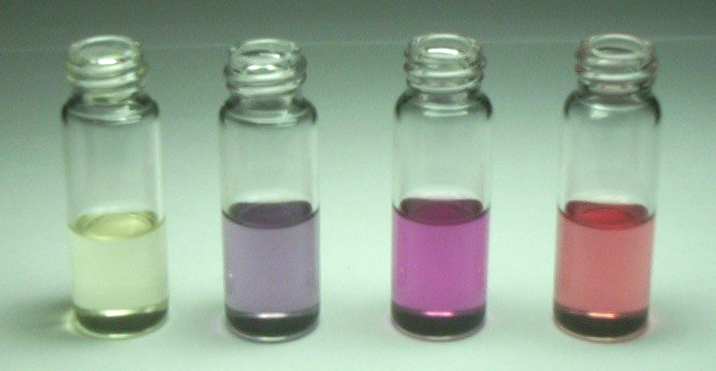
(a) (b) (c) (d)

**Fig. S 2.** Color changes of **1** in CHCl3. [**1**] = 5 x 10-5 M, [anion] = 40 equiv. (a) **1** (b) **1** + F- (c) **1** + H2PO4- (d) **1** + AcO-.

References

1. D. H. Lee, K. H. Lee and J.-I. Hong, *Org. Lett.,* 2001, **3***,* 5-8.
2. K. A. Conners, *Binding Constants*, John Wiley and Sons, New York, 1987.
